# Supplementary material for: Genomic Etiology of Pierre Robin Sequence in Africans with Orofacial Clefts
Source: Research Square preprint supplement (doi:10.21203/rs.3.rs-8214951/v1), 2025-12-15
Supplement: Supplementary file 1 [file 151c017692a11f0d0a8dd70a.docx]

| **Tool** | **Range** | **Predictive threshold** |
| --- | --- | --- |
| ClinPred | 0-1 | >0.5 |
| MetaRNN |  | >0.5 |
| BayesDel_addAF | -1.11707-0.750927 | >0.0692655 |
| REVEL | 0-1 | >0.5 |
| CADD | 0-50+ | >20 |
| AlphaMissense | 0-1 | **Pathogenic (>=0.564-1)**, Ambiguous (0.34-0.56), Benign (<0.34) |
| MutPred | 0-1 | >0.5 |
| PolyPhen2 | 0-1 | >0.5 |
| MutationAssessor | -5.17-6.49 | High (>3.5), Medium (1.935-3.5). We used >=1.935 (to cater for both medium and high |
| MutationTaster_rankscore |  | >0.31733 |
| SIFT | 0-1 | <0.05 |
| Splice AI (If any of these:  SpliceAI_pred_DS_AG, SpliceAI_pred_DS_AL, SpliceAI_pred_DS_DG, SpliceAI_pred_DS_DG | 0-1 | >0.2 |
