# Supplementary material for: Genomic Etiology of Pierre Robin Sequence in Africans with Orofacial Clefts
Source: Research Square preprint supplement (doi:10.21203/rs.3.rs-8214951/v1), 2025-12-15
Supplement: Supplementary file 2 [file 33bafbcda0547787508e49a5.docx]

| **Proband (ID)** | **Genomic Coordinate** | **Gene** | **OLIGO** | **Seq** | **Start** | **length** | **tm** | **gc%** | **any_**  **th** | **3'_**  **th** | **hairpin** | **Product**  **Size** |
| --- | --- | --- | --- | --- | --- | --- | --- | --- | --- | --- | --- | --- |
| GH20130801_1 | Chr5:11082776 | *CTNND2* | Left Primer | TCTAAAAGATGACTCAGTGCAGT | 41 | 23 | 57.53 | 39.13 | 0 | 0 | 0 | 539 |
| Right Primer | CCTGAAATCTTTGTCCCCAAGT | 579 | 22 | 58.5 | 45.45 | 0 | 0 | 0 |
| GH20130842_1 | Chr12:115961289 | *MED13L* | Left Primer | ACACCAGTAACTAAGAGGATTTCA | 65 | 24 | 57.32 | 37.5 | 0 | 0 | 0 | 687 |
| Right Primer | AGGATGAGGGAAAGAGCCTG | 751 | 20 | 58.79 | 55 | 0 | 0 | 0 |
| GH20172460_1 | Chr12:114672106 | *TBX3* | Left Primer | TGGACTGGAATGAAAAGACGTG | 2 | 22 | 58.86 | 45.45 | 0 | 0 | 0 | 523 |
| Right Primer | CGCTGTGTGTCTCTTTTCTCA | 524 | 21 | 58.53 | 47.62 | 0 | 0 | 0 |
| GH20218075_1 | Chr2:199348996 | *SATB2* | Left Primer | GGTTGATGGCTTGAGGATGC | 170 | 20 | 59.26 | 55 | 0 | 0 | 0 | 282 |
| Right Primer | CAGACTATTGTGTTCTGGGCC | 451 | 21 | 58.64 | 52.38 | 0 | 0 | 0 |
