# Supplementary material for: Genomic Etiology of Pierre Robin Sequence in Africans with Orofacial Clefts
Source: Research Square preprint supplement (doi:10.21203/rs.3.rs-8214951/v1), 2025-12-15
Supplement: Supplementary file 3 [file 377ae8476ae9f49f4ad742d4.docx]

| **SN** | **ID (sex)** | **Genomic**  **coordinate** | **GENE** | **CADD_PHRED** | **CADD_RAW** |
| --- | --- | --- | --- | --- | --- |
| **2** | GH20130800_1 (XX) | chr12:47989799 (rs1565686896) | ***COL2A1*** | 40 | 9.26383 |
| **16** | GH20228109_1 (XY) | chr18:10682287 **(novel)** | ***PIEZO2*** | 39 | 9.117655 |

| RED | Deleterious |
| --- | --- |
| GREEN | Tolerable |
| N/A | Not Available |
