# Supplementary material for: Genomic Etiology of Pierre Robin Sequence in Africans with Orofacial Clefts
Source: Research Square preprint supplement (doi:10.21203/rs.3.rs-8214951/v1), 2025-12-15
Supplement: Supplementary file 5 [file 5e7718aaaffa26e7235b3fb2.docx]

| **SN** | **ID (sex)** | **Genomic**  **coordinate** | **GENE** | **SpliceAI_pred_DS_AG** | **SpliceAI_pred_DS_AL** | **SpliceAI_pred_DS_DG** | **SpliceAI_pred_DS_DG** |
| --- | --- | --- | --- | --- | --- | --- | --- |
| **6** | GH20134969_1 (XX) | chr12:31085125 (rs2536756) | ***DDX11*** | 0 | 0 | 0.58 | 0.05 |
| **18** | GH20228152_1 (XY) | chr12:31085125 (rs2536756) | ***DDX11*** | 0 | 0 | 0.58 | 0.05 |

| RED | Deleterious |
| --- | --- |
| GREEN | Tolerable |
| N/A | Not Available |
