# Supplementary material for: Genomic Etiology of Pierre Robin Sequence in Africans with Orofacial Clefts
Source: Research Square preprint supplement (doi:10.21203/rs.3.rs-8214951/v1), 2025-12-15
Supplement: Supplementary file 9 [file ebee032f69046b255babf03f.docx]

| **Proband ID (sex)** | **Genomic**  **coordinate** | **GENE** | **SIFT_**  **score** | **Polyphen2**  **score** | **Mutation**  **Taster**  **score** | **Mutation**  **Assessor**  **score** | **MetaRNN**  **score** | **REVEL**  **score** | **MutPred**  **score** | **BayesDel**  **_addAF**  **score** | **ClinPred**  **score** | **CADD score** | **Alpha Missense**  **score** |
| --- | --- | --- | --- | --- | --- | --- | --- | --- | --- | --- | --- | --- | --- |
| GH20130774_1 (XX) | chr15:28265707 (rs397518474) | ***HERC2*** | 0.012 | 0.968 | 0.81001 | 3.675 | 0.992029 | 0.865 | 0.889 | 0.539585 | 0.995715 | 21.9 | 0.9618 |
| chr7:27163727 (rs144037880) | ***HOXA9*** | 0.041 | 0.999 | 0.81001 | 0.11 | 0.23086941 | 0.605 | 0.519 | -0.07767 | 0.118014 | 29.5 | 0.7764 |
| chr7:27165302 (rs184887356) | ***HOXA9*** | 0.01 | 0.828 | 0.3235 | 2.69 | 0.01215753 | 0.598 | 0.675 | -0.20148 | 0.089519 | 23.3 | 0.775 |
| GH20130801_1 (XX) | chr5:11082776 **(novel)** | ***CTNND2*** | 0.115 | 0.549 | 0.81001 | 0.2 | 0.449464 | 0.411 | 0.387 | 0.113015 | 0.882487 | 27.4 | 0.6284 |
| chr18:10742593 (rs115526553) | ***PIEZO2*** | 0.003 | N/A | 0.52935 | 3.47 | 0.027977 | 0.543 | N/A | -0.11008 | 0.211478 | 25.9 | 0.7701 |
| GH20130815_1 (XX) | chr13:27623177 (rs138256149) | ***POLR1D*** | 0.014 | N/A | 0.81001 | 2.45 | 0.052371 | 0.722 | N/A | -0.05169 | 0.084913 | 23.9 | 0.6624 |
| chr6:70216988 (rs760617713) | ***COL9A1*** | 0.012 | 1 | 0.81001 | 3.04 | 0.702417 | 0.64 | N/A | 0.042742 | 0.860611 | 31 | 0.1087 |
| chr5:11199520 (rs756796096) | ***CTNND2*** | 0.032 | 0.997 | 0.81001 | 2.14 | 0.844303 | 0.807 | N/A | 0.098888 | 0.988198 | 28.9 | 0.4425 |
| GH20130842_1 (XY) | chr12:115961289 **(novel)** | ***MED13L*** | 0.017 | 0.993 | 0.81001 | 1.995 | 0.700439 | 0.585 | 0.443 | 0.072295 | 0.974739 | 26.5 | 0.5817 |
| GH20140628_1 (XY) | chr1:94044692 (rs61749455) | ***ABCA4*** | 0.001 | 1 | 0.81001 | 3.76 | 0.105301 | 0.941 | 0.97 | 0.312323 | 0.112671 | 26 | 0.2674 |
| GH20160169_1 (XY) | chr1:94044692 (rs61749455) | ***ABCA4*** | 0.001 | 1 | 0.81001 | 3.76 | 0.105301 | 0.941 | 0.97 | 0.312323 | 0.112671 | 26 | 0.2674 |
| chr21:34792308 (COSV99038603) | ***RUNX1*** | 0.003 | 0.232 | 0.44886 | 2.215 | 0.488209 | 0.284 | 0.615 | -0.00008 | 0.958562 | 24.2 | 0.1573 |
| GH20172460_1 (XY) | chr12:114672106 **(novel)** | ***TBX3*** | 0.075 | 0.998 | 0.81001 | 2.79 | 0.738925 | 0.654 | 0.406 | 0.390596 | 0.995578 | 26.7 | 0.3532 |
| GH20172493_1 (XX) | chr13:27623177 (rs138256149) | ***POLR1D*** | 0.014 | N/A | 0.81001 | 2.45 | 0.052371 | 0.722 | N/A | -0.05169 | 0.084913 | 23.9 | 0.6624 |
| chr7:33966520 (rs139057966) | ***BMPER*** | 0.003 | 1 | 0.81001 | 3.75 | 0.970473 | 0.771 | 0.801 | 0.180827 | 0.999407 | 29.4 | 0.9219 |
| GH20172504_1 (XX) | chr1:94007655 (rs141489669) | ***ABCA4*** | 0.013 | 0.998 | 0.81001 | 0.83 | 0.812978 | 0.787 | N/A | -0.03458 | 0.724234 | 25.3 | 0.3449 |
| chr14:74292777 **(novel)** | ***ABCD4*** | 0.035 | 0.897 | 0.81001 | 1.68 | 0.568617 | 0.653 | 0.413 | 0.292064 | 0.953389 | 23.3 | 0.0988 |
| chr6:49456155 (rs2228282) | ***MMUT*** | 0 | N/A | 0.81001 | N/A | 0.338358 | 0.921 | N/A | 0.195042 | 0.198760 | 28.8 | 0.7035 |
| GH20218031_1 (XX) | chr22:19978897 (COSV54267566) | ***ARVCF*** | 0 | 1 | 0.81001 | 3.68 | 0.923712 | 0.826 | 0.695 | 0.395294 | 0.998822 | 35 | 0.9999 |
| chr9:134806210 (rs1401133868) | ***COL5A1*** | 0.018 | 0.651 | 0.49637 | 2.02 | 0.652063 | 0.416 | 0.485 | 0.190015 | 0.752791 | 22.1 | 0.0825 |
| GH20218053_1 (XX) | chr2:237376980 **(novel)** | ***COL6A3*** | 0.005 | 1 | 0.26354 | 3.68 | 0.662423 | 0.349 | 0.652 | 0.042534 | 0.974347 | 5.393 | 0.75 |
| chr6:49459186 (rs535411418) | ***MMUT*** | 0 | N/A | 0.81001 | N/A | 0.990739 | 0.986 | 0.995 | 0.42104 | 0.999803 | 28.2 | 0.9886 |
| GH20218075_1 (XY) | chr21:34792308 (COSV99038603) | ***RUNX1*** | 0.003 | 0.232 | 0.44886 | 2.215 | 0.488209 | 0.284 | 0.615 | -0.00008 | 0.958562 | 24.2 | 0.1573 |
| GH20228109_1 (XY) | chr16:3729445 (rs886039491) | ***CREBBP*** | 0 | 1 | 0.81001 | 2.555 | 0.872605 | 0.674 | 0.39 | 0.422593 | 0.996802 | 25 | 0.9928 |
| GH20228147_1 (XY) | chr6:15520166 (rs1187499308) | ***JARID2*** | 0 | 0.993 | 0.81001 | 1.905 | 0.542385 | 0.513 | 0.263 | 0.263308 | 0.942053 | 24.6 | 0.4266 |
| chr8:60281143 **(novel)** | ***CA8*** | 0 | 0.981 | 0.51968 | 0.805 | 0.633134 | 0.199 | 0.189 | 0.034411 | 0.898415 | 29.6 | 0.1182 |
| GH20228152_1 (XY) | chr1:1054497 (rs781607506) | ***AGRN*** | 0.033 | N/A | 0.81001 | N/A | 0.786783 | 0.646 | N/A | 0.085406 | 0.873406 | 25.3 | 0.2272 |

| RED | Deleterious |
| --- | --- |
| GREEN | Tolerable |
| N/A | Not Available |
