# Supplementary figures and images for: Genomic Etiology of Pierre Robin Sequence in Africans with Orofacial Clefts
Source: Research Square preprint supplement (doi:10.21203/rs.3.rs-8214951/v1), 2025-12-15

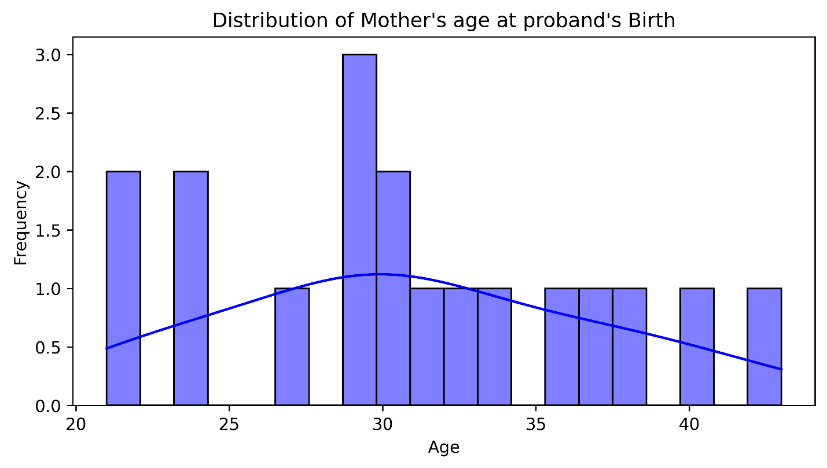

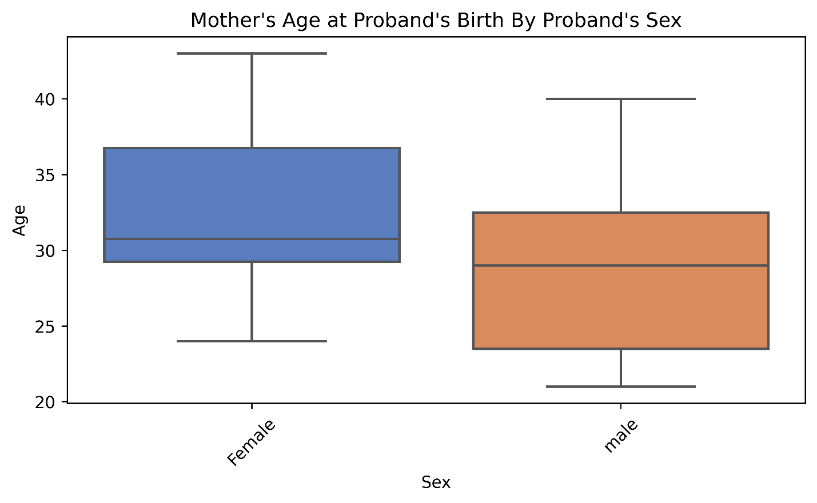

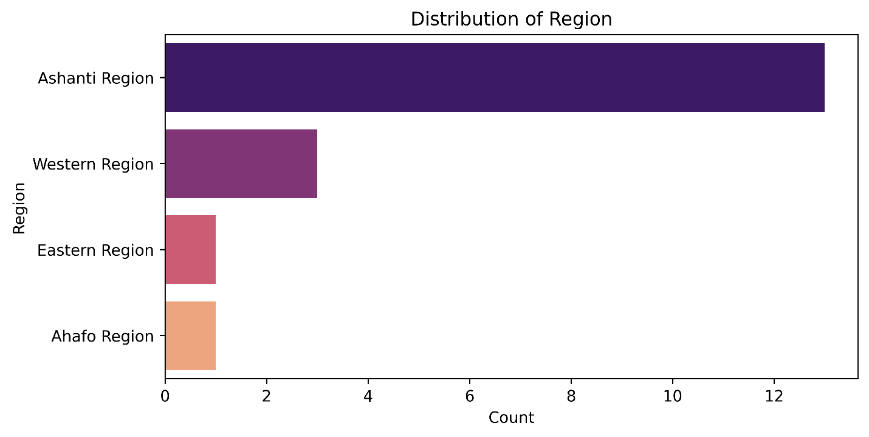

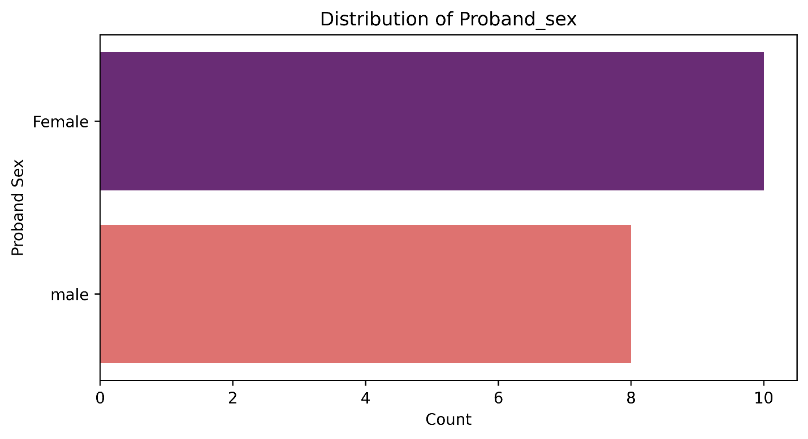

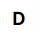

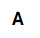

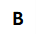

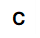

Supplement: Supplementary file 4 [file 4ae66bea336b9bc1b2e7fd2b.docx]

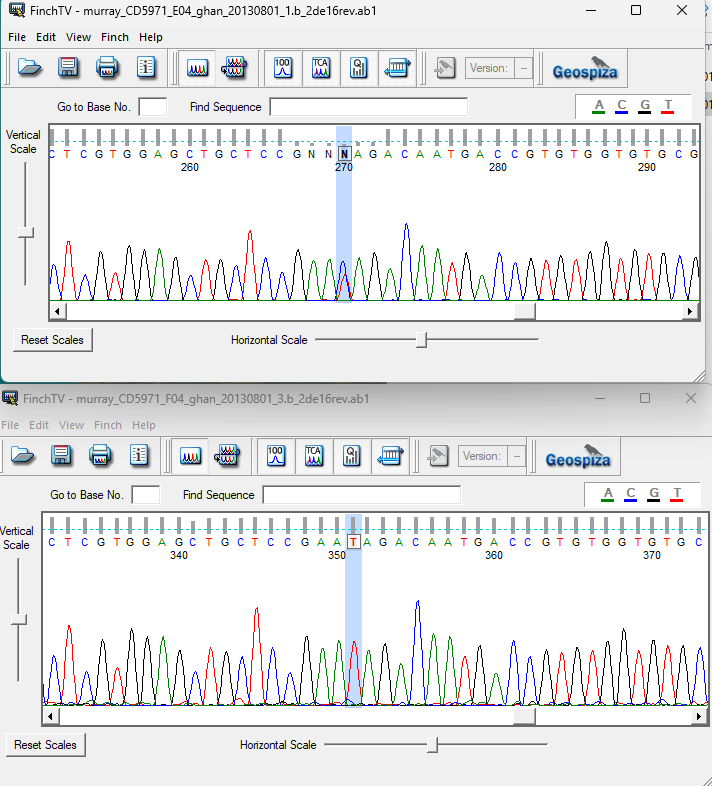

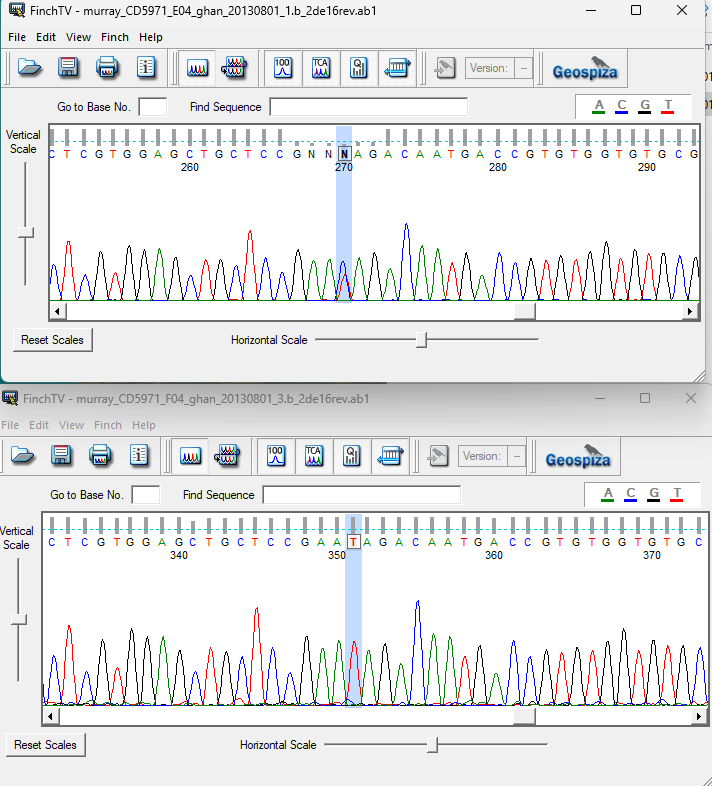

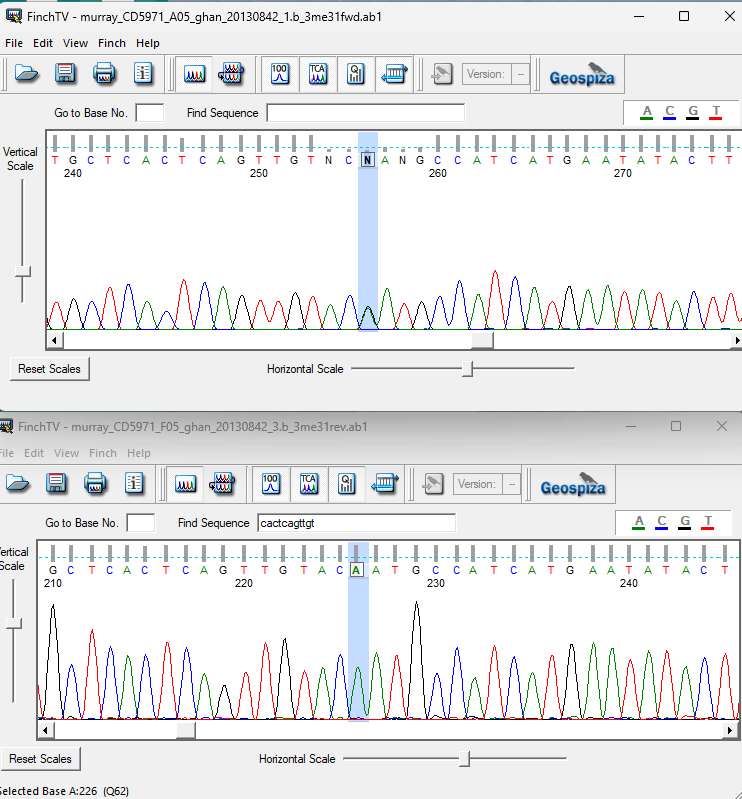

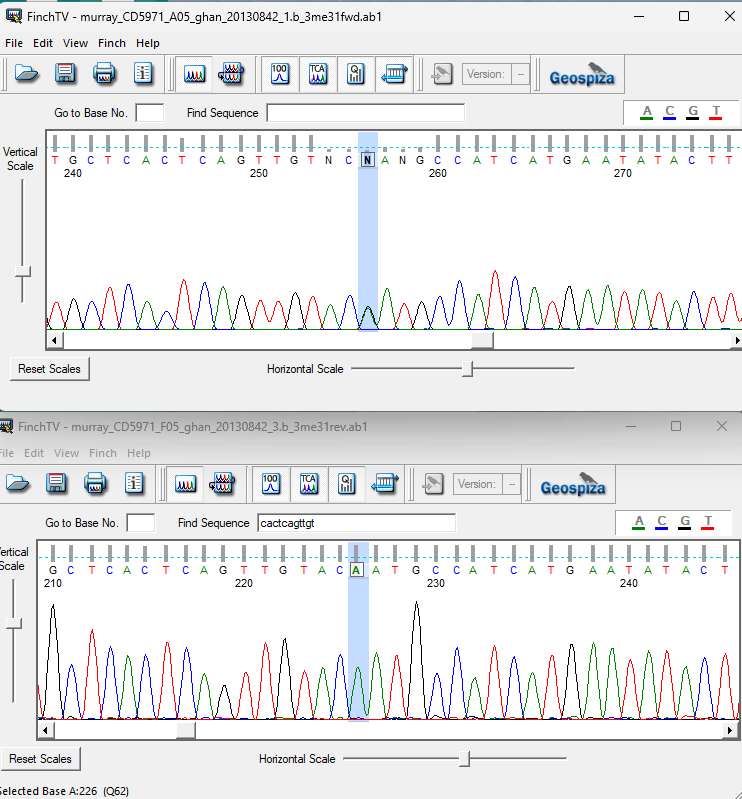

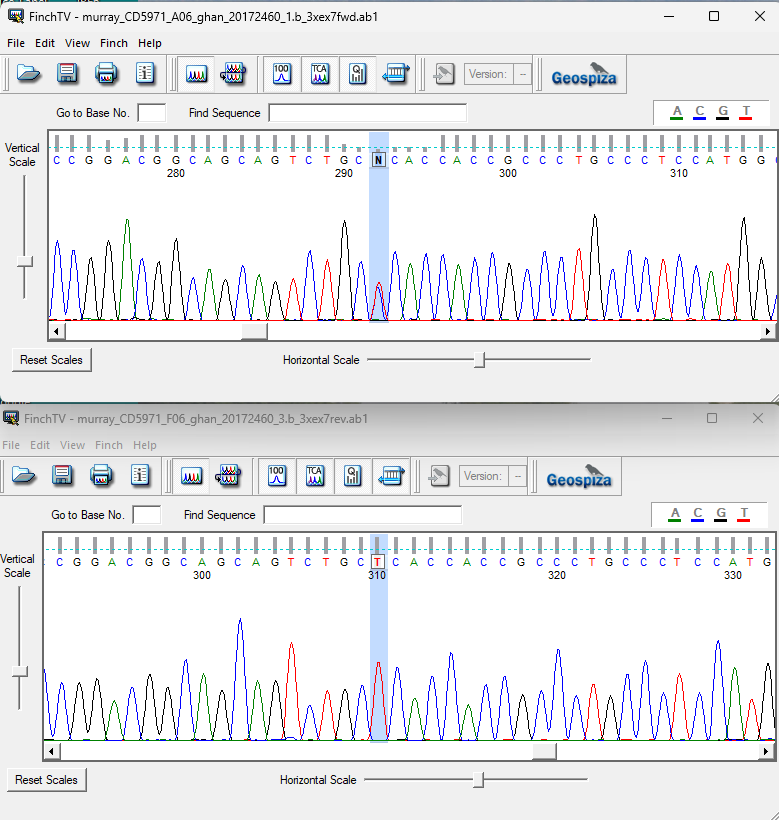

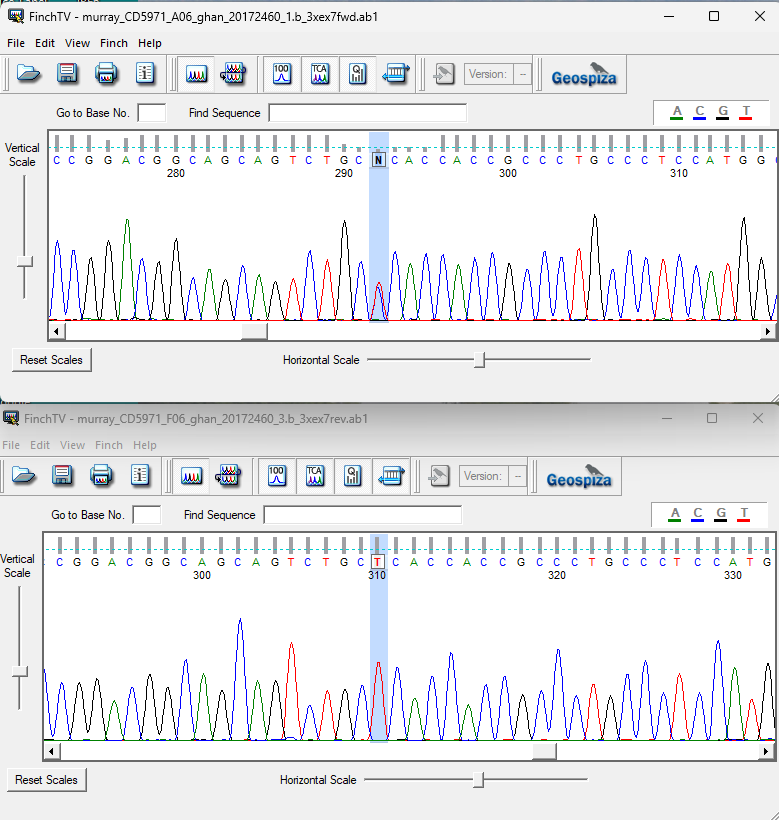

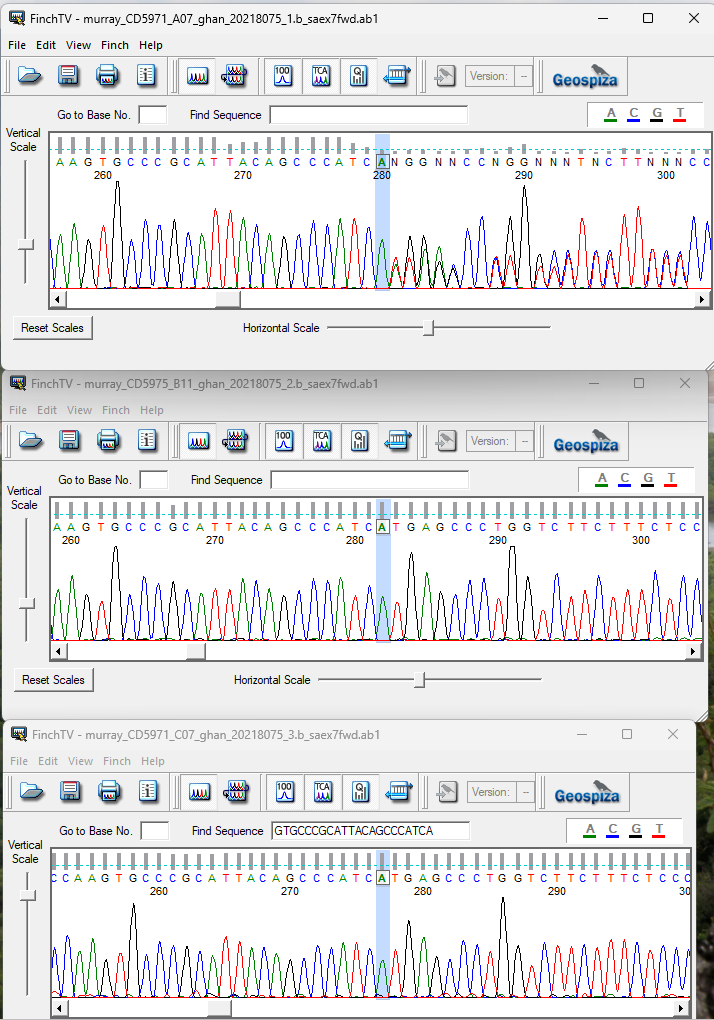

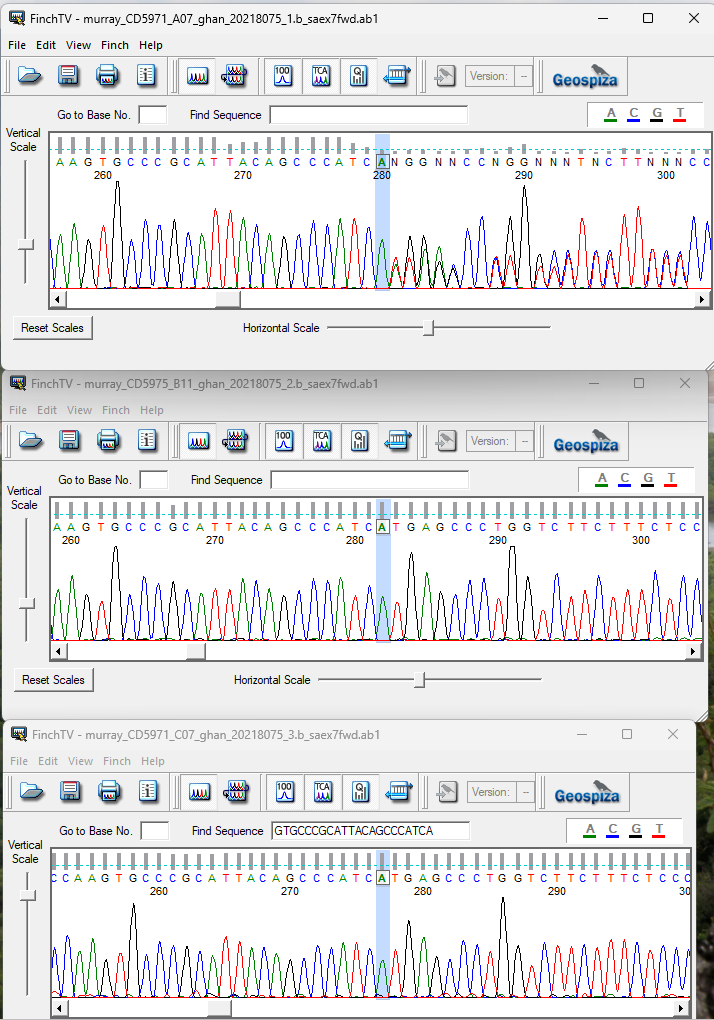

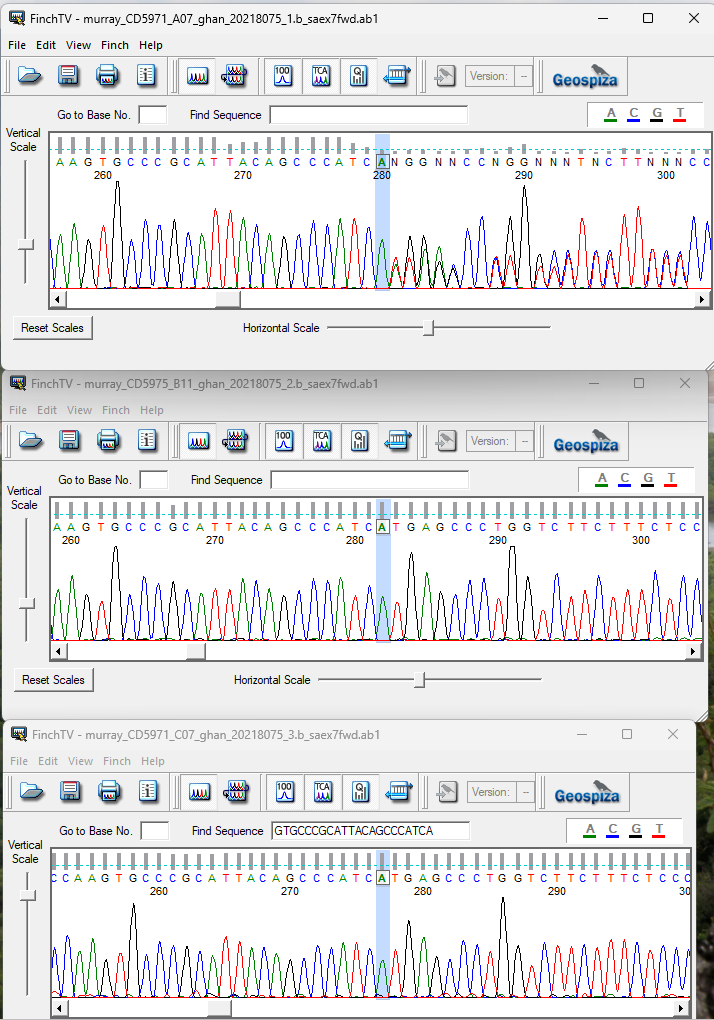

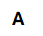

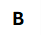

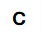

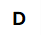

Supplement: Supplementary file 6 [file b612c267c029059976f0ac4d.docx]

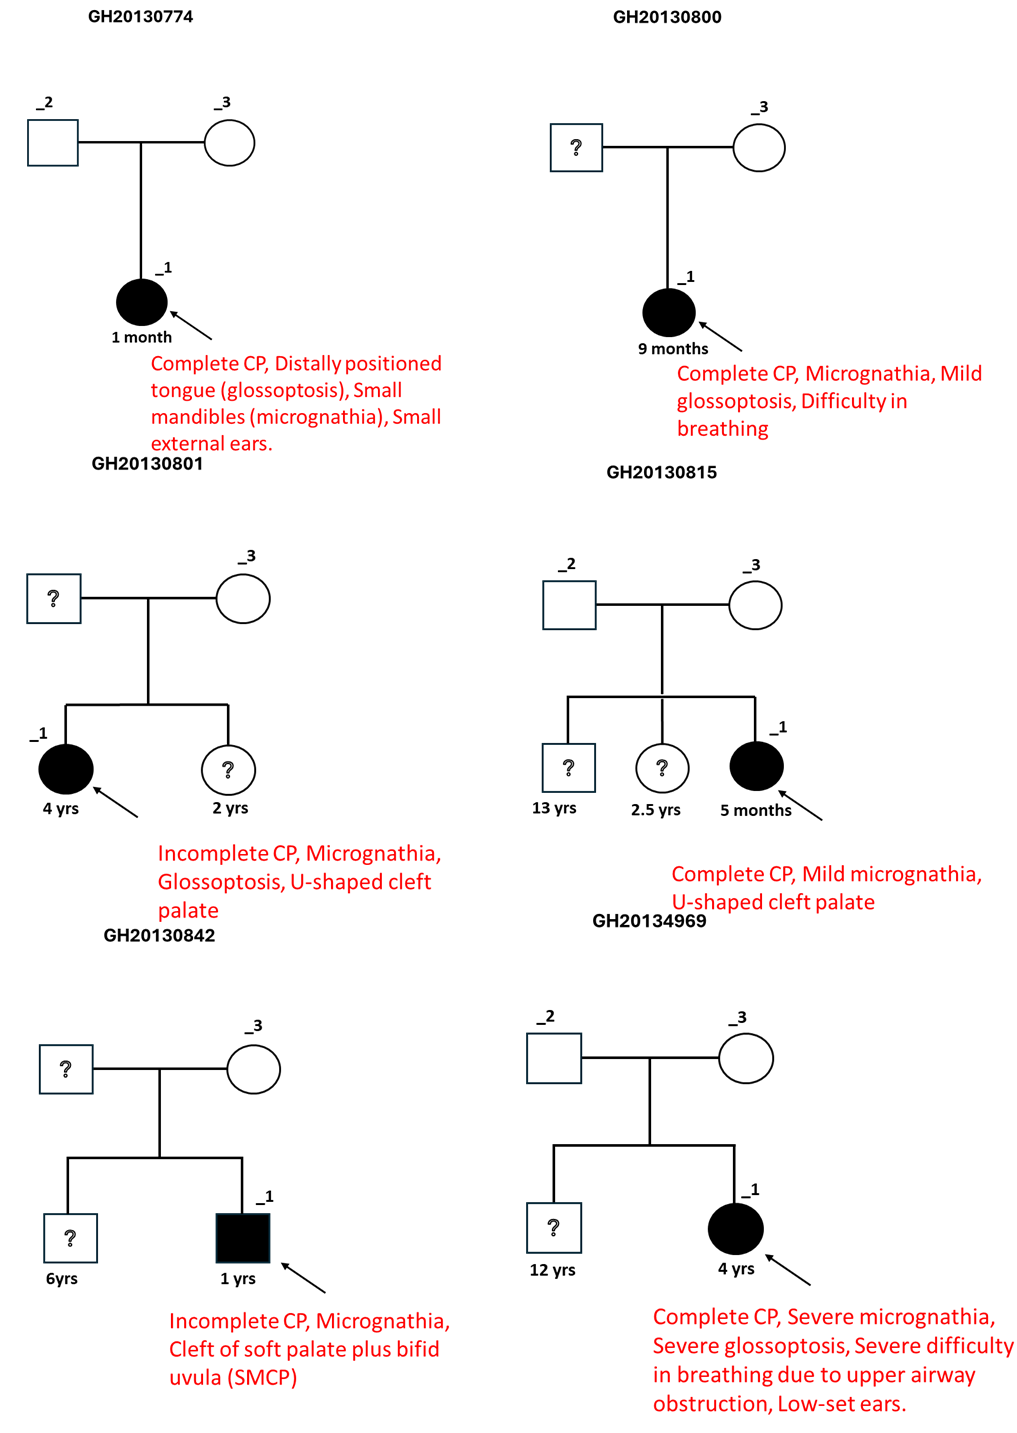

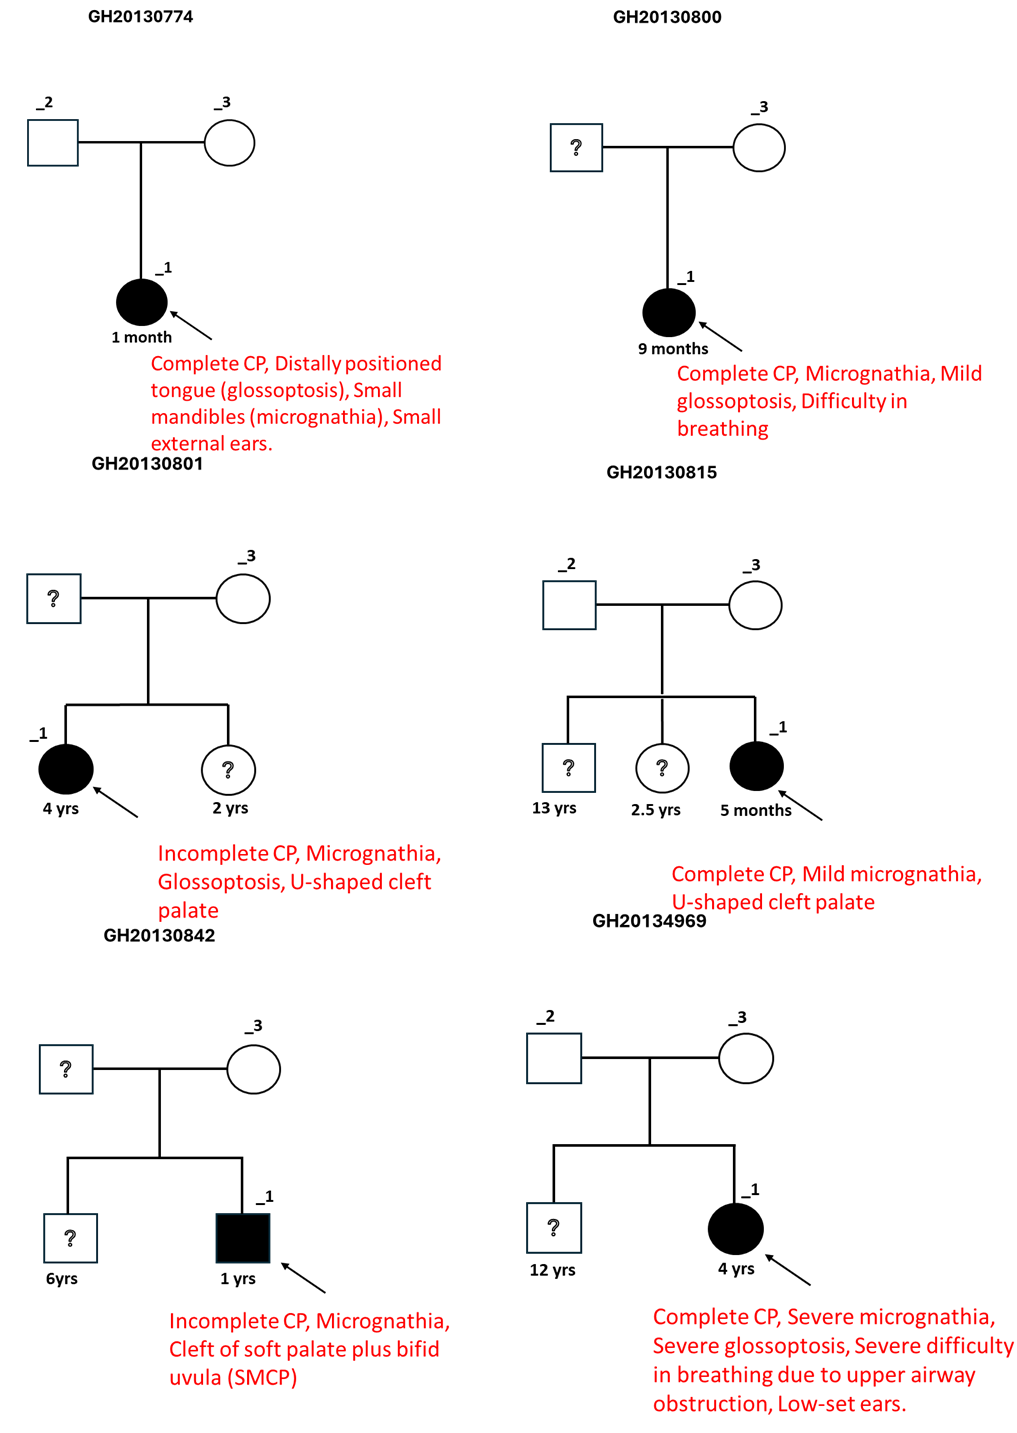

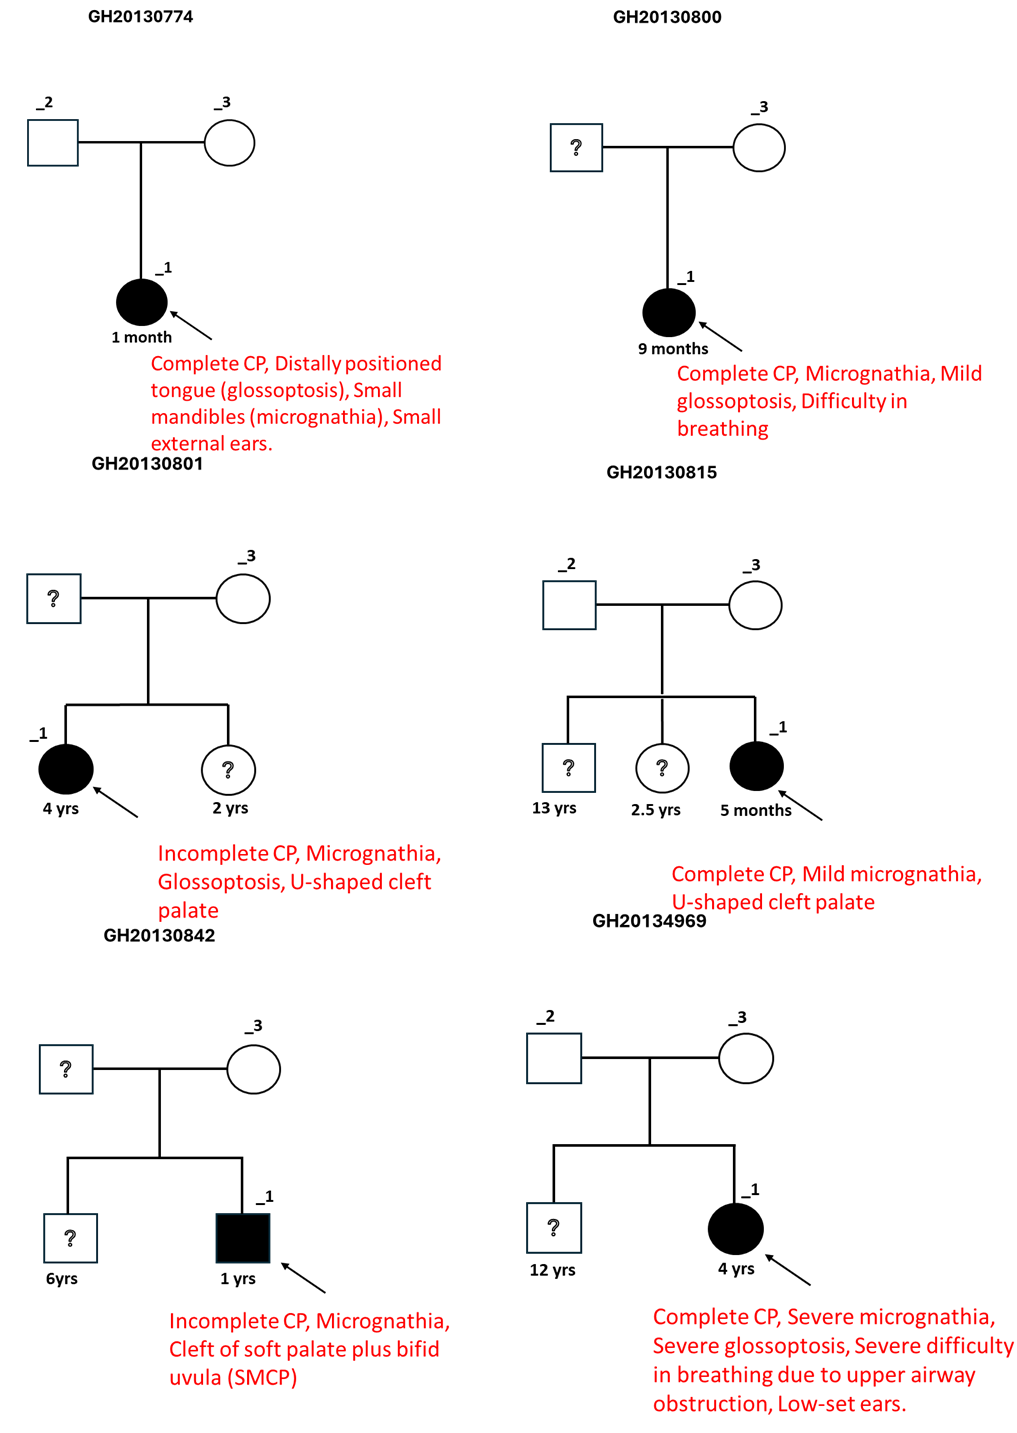

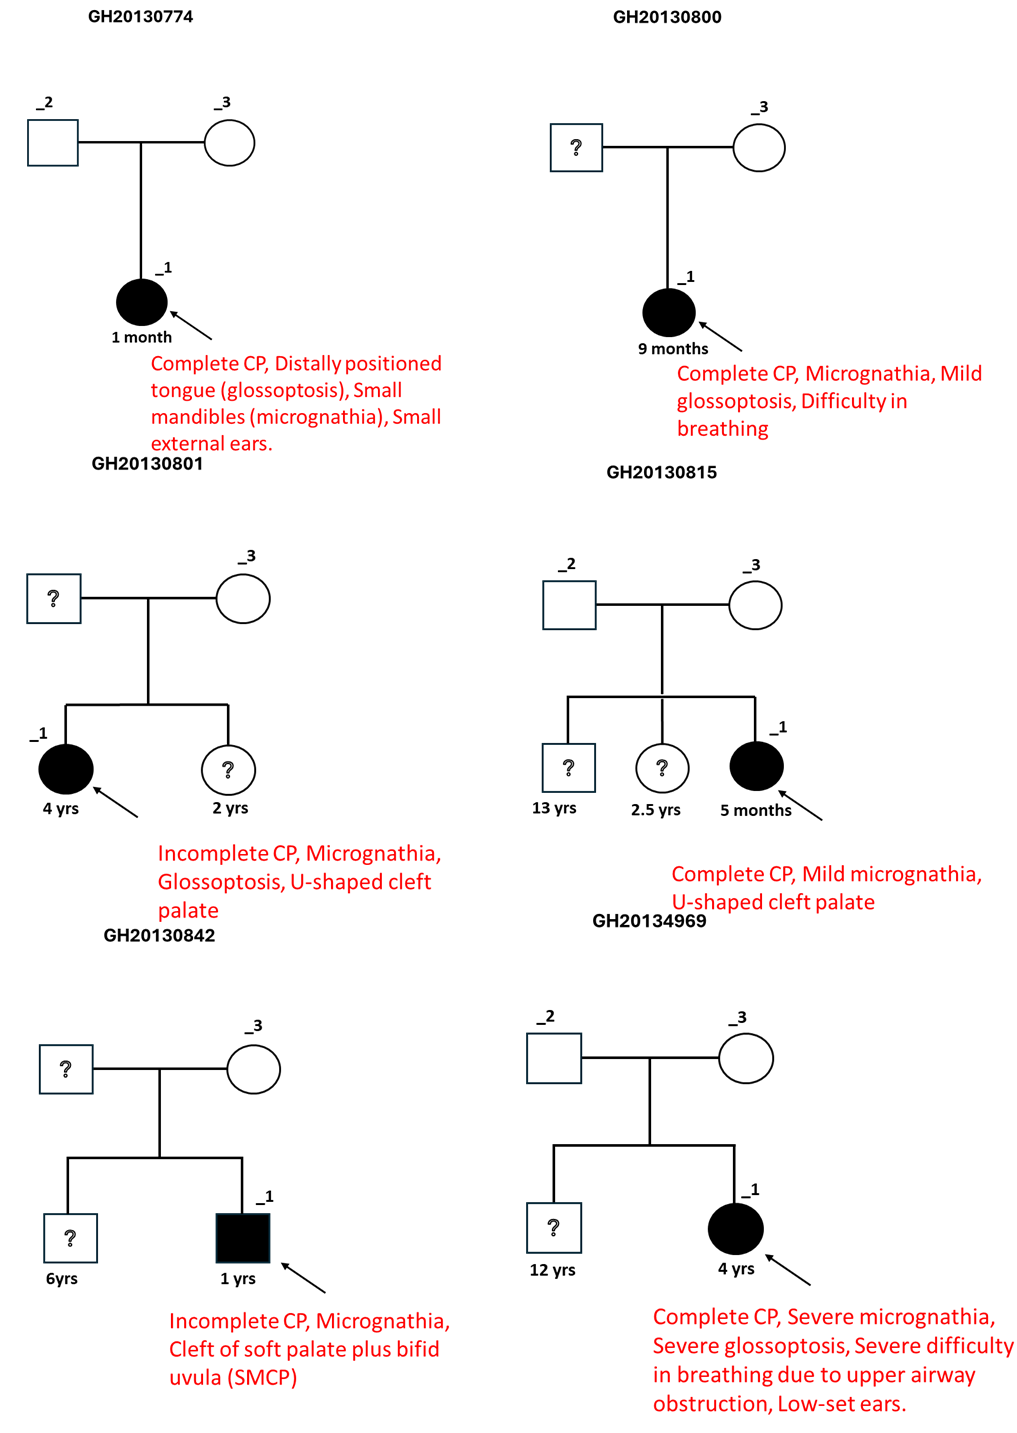

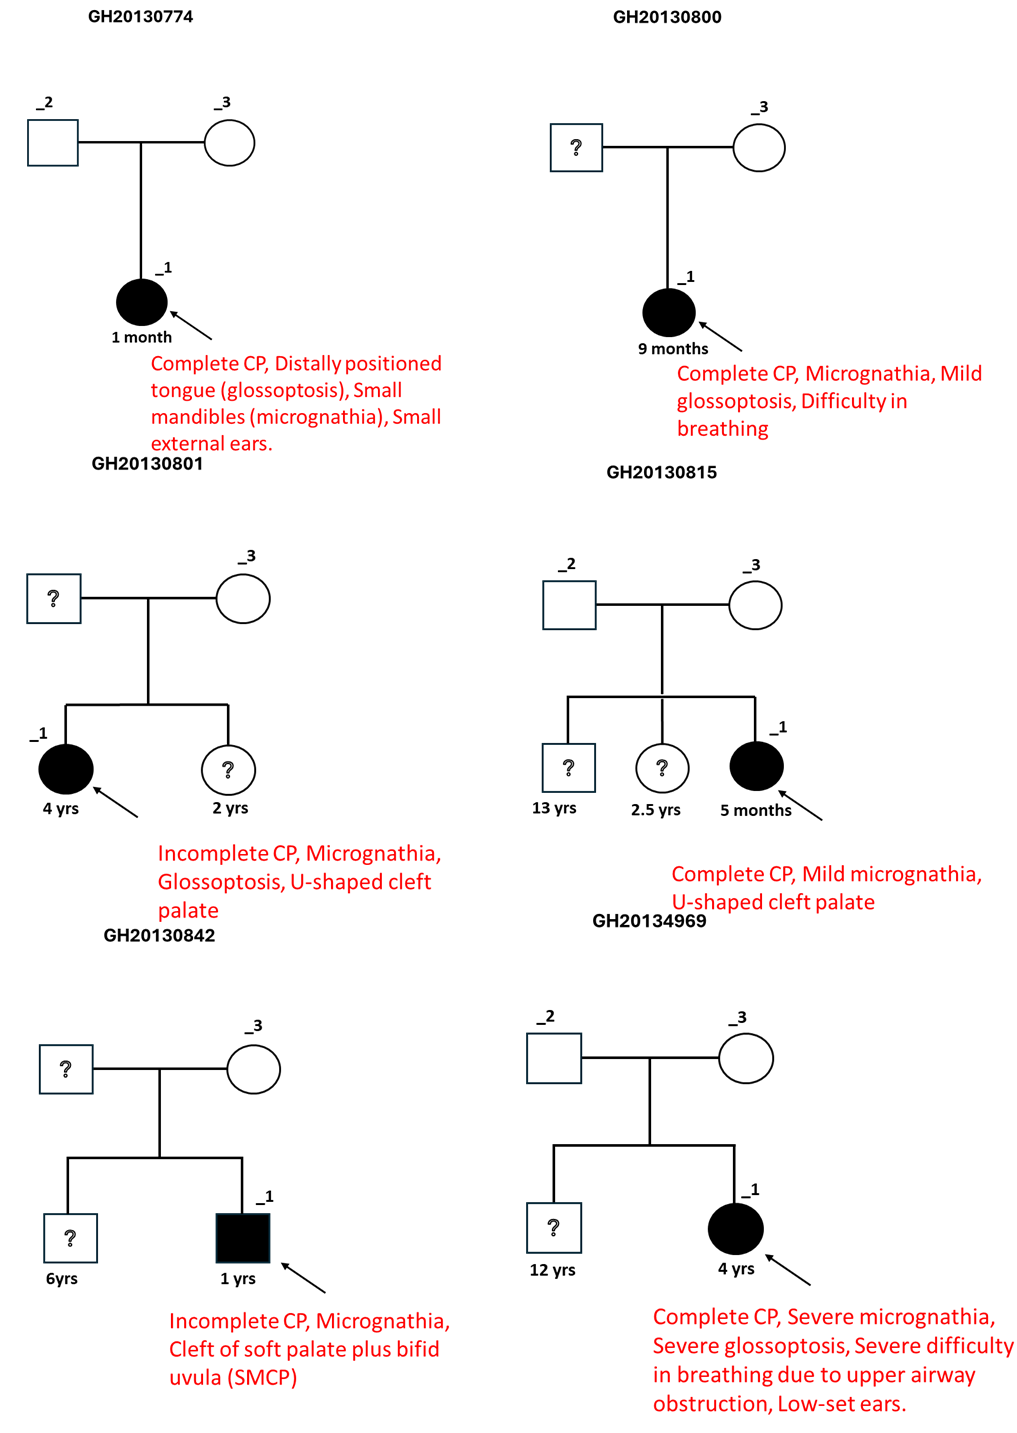

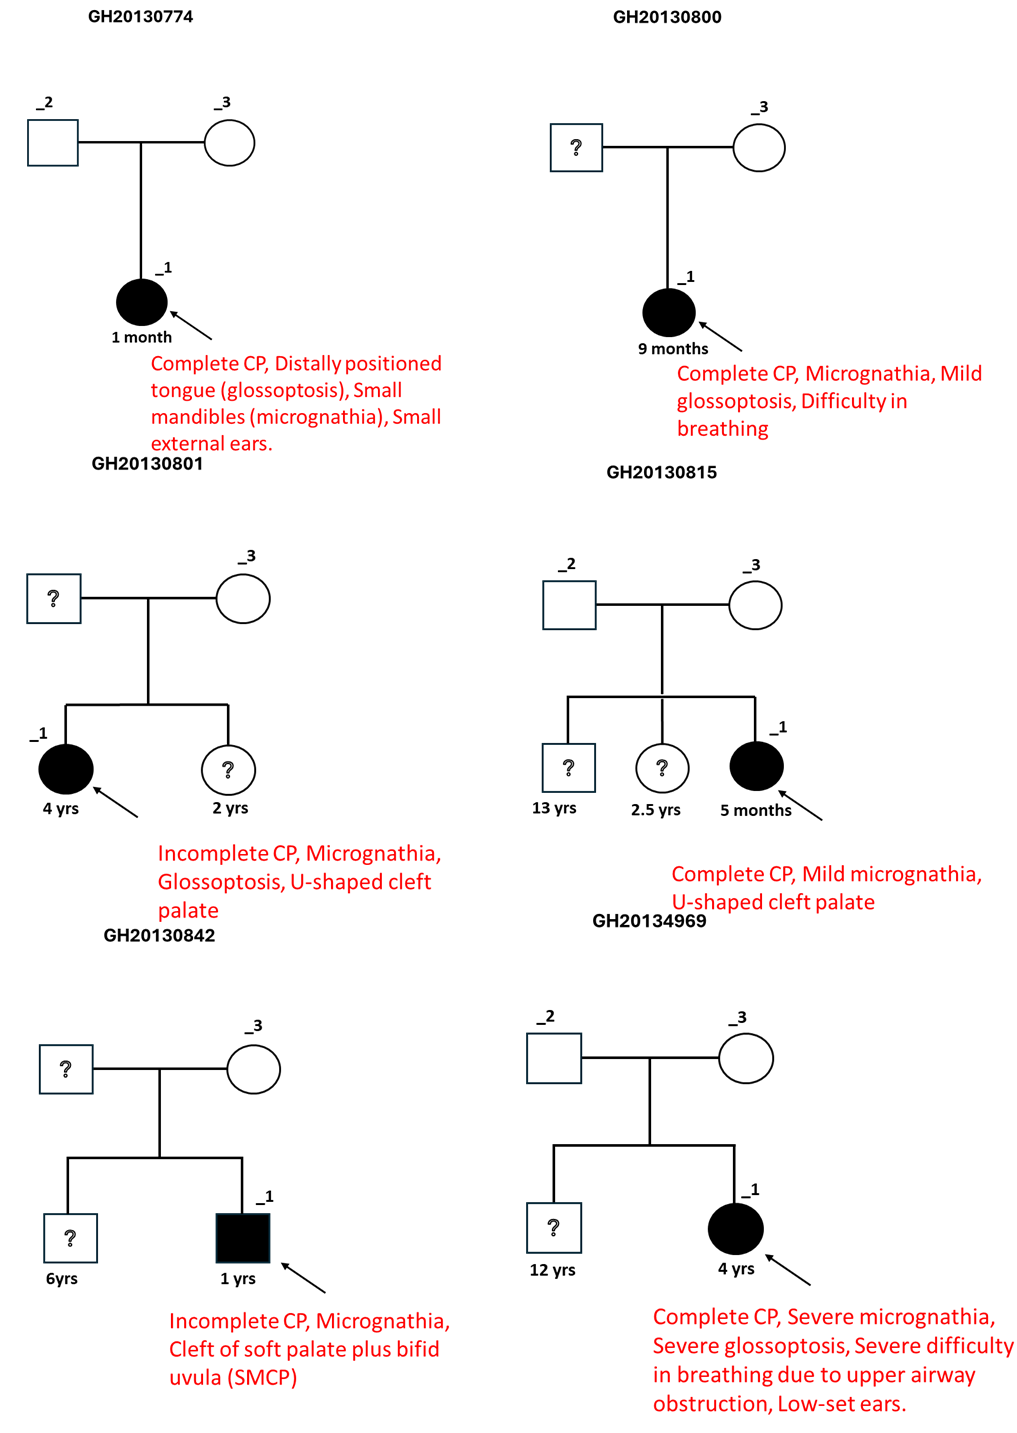

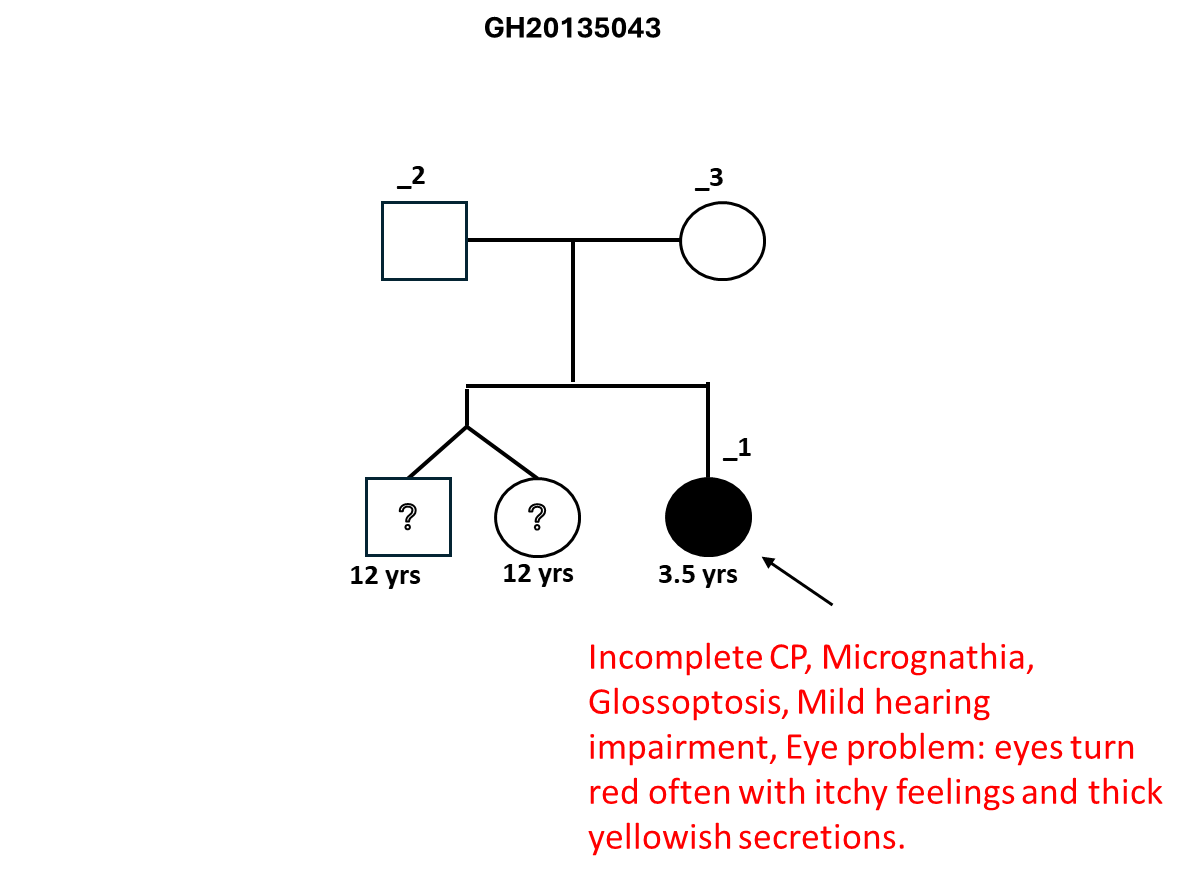

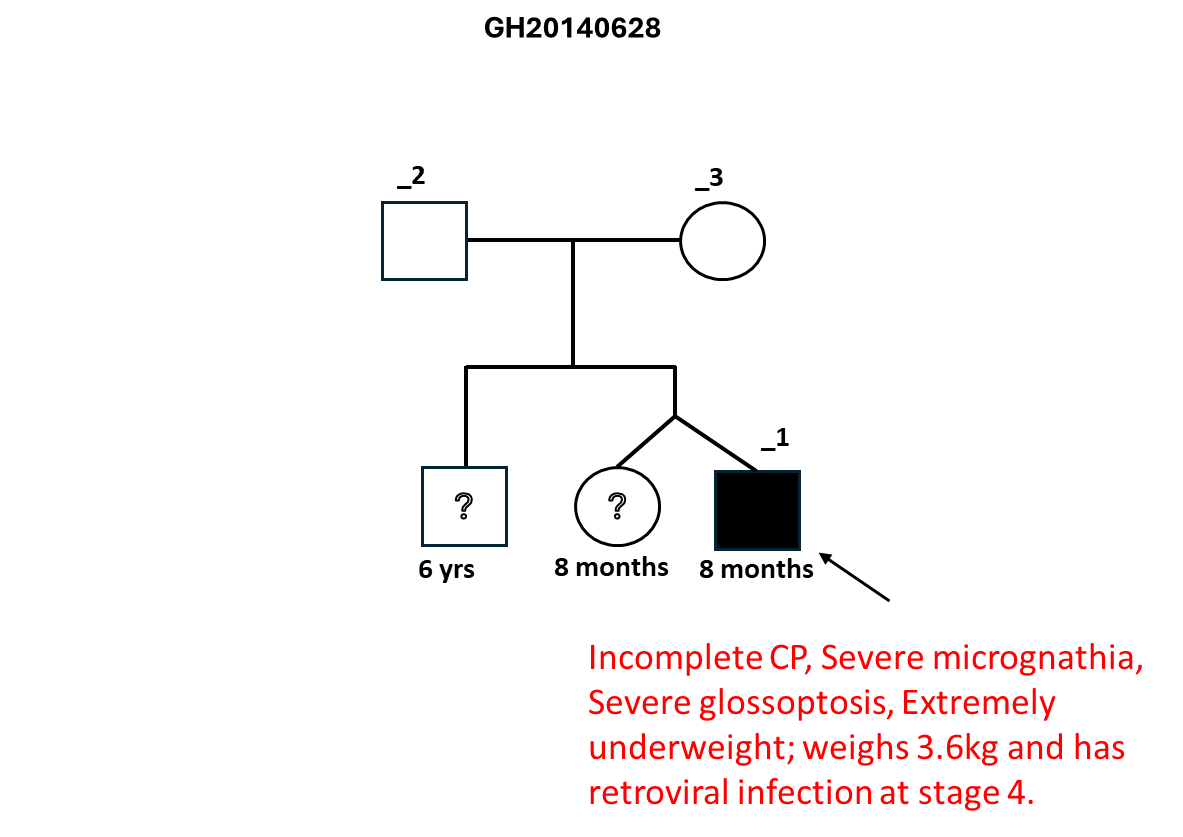

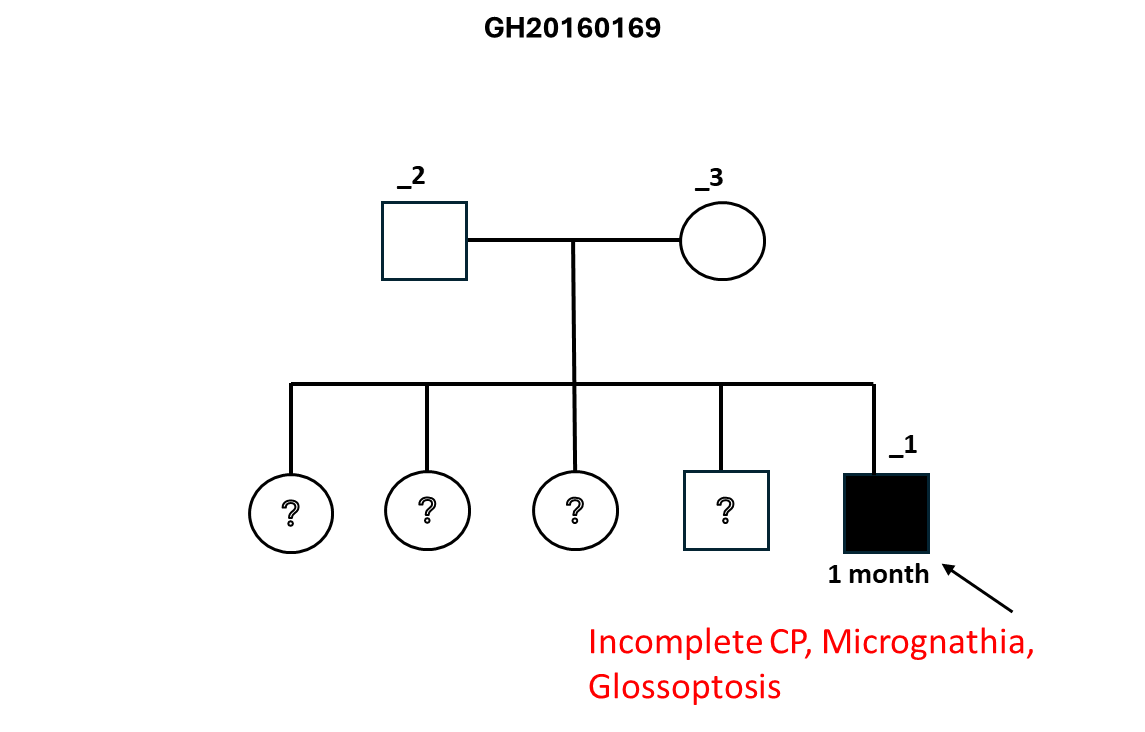

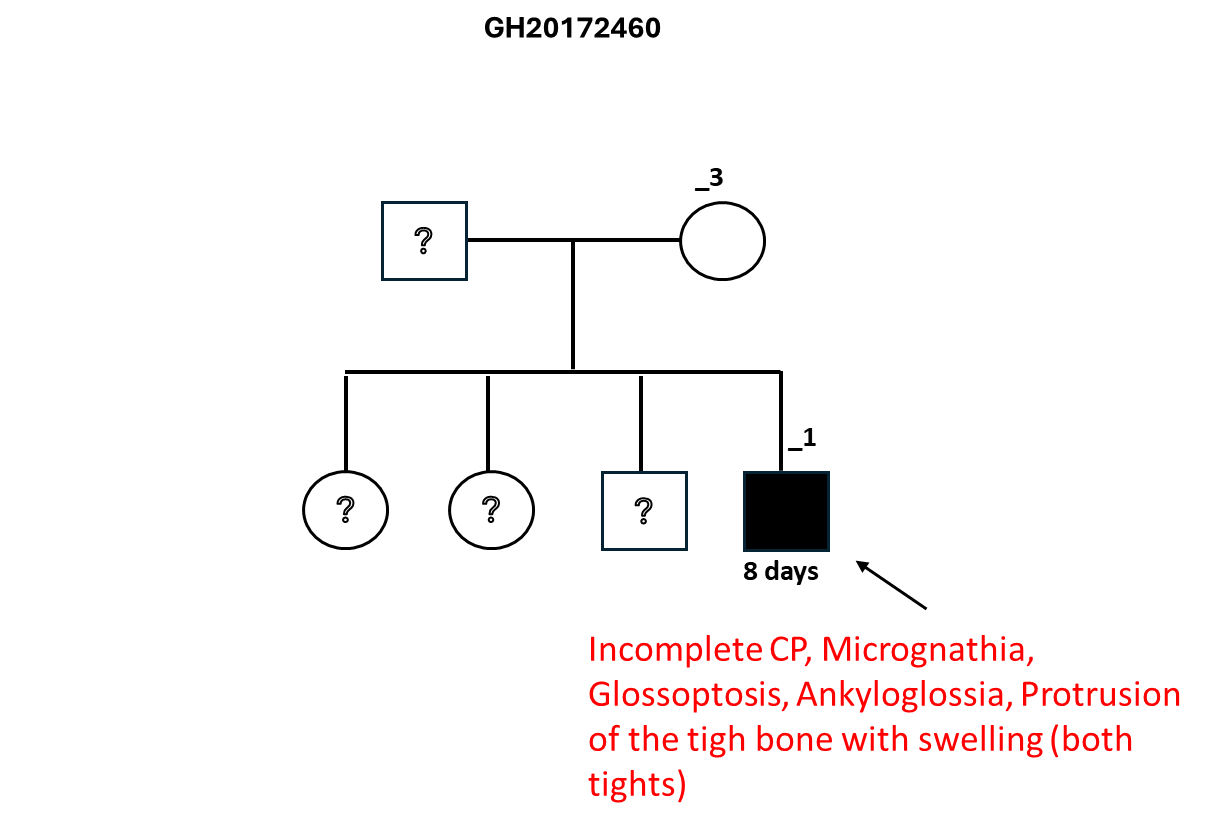

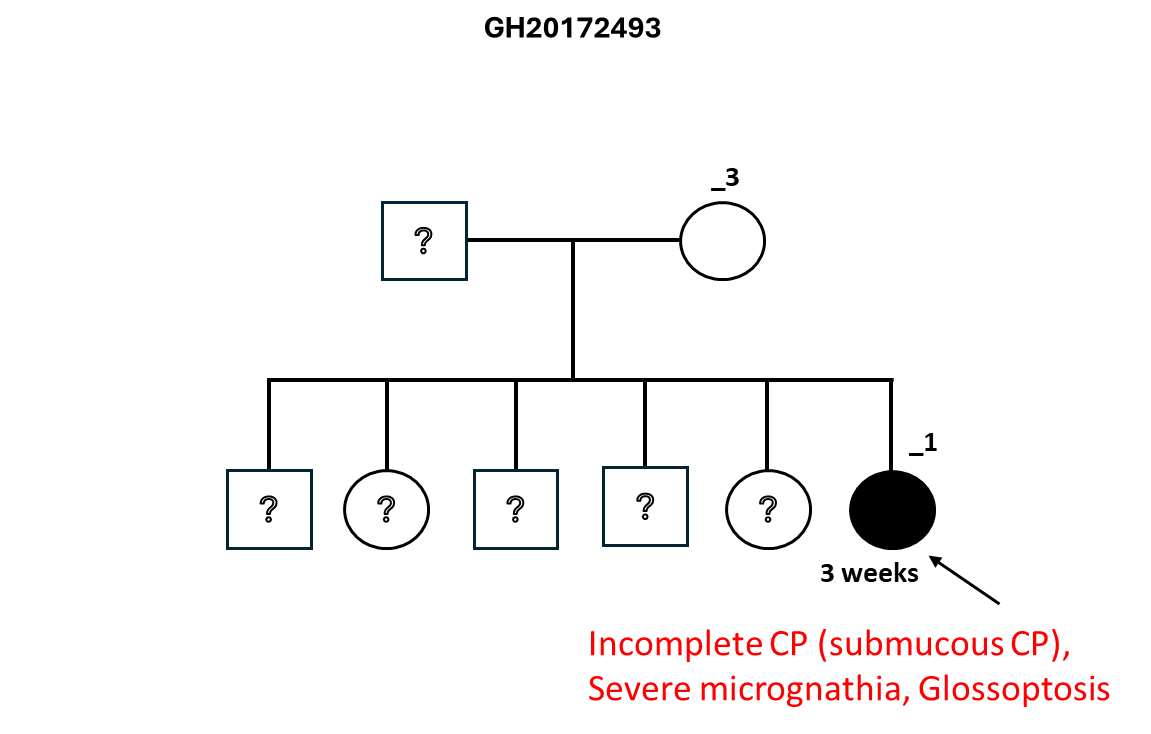

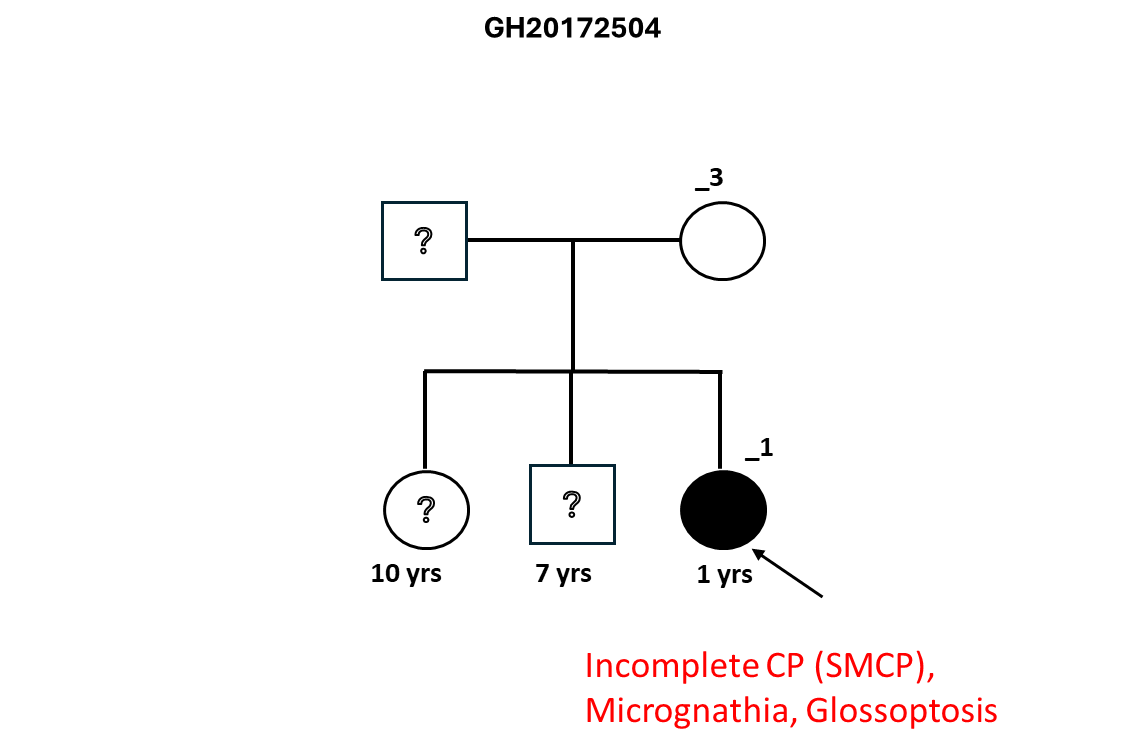

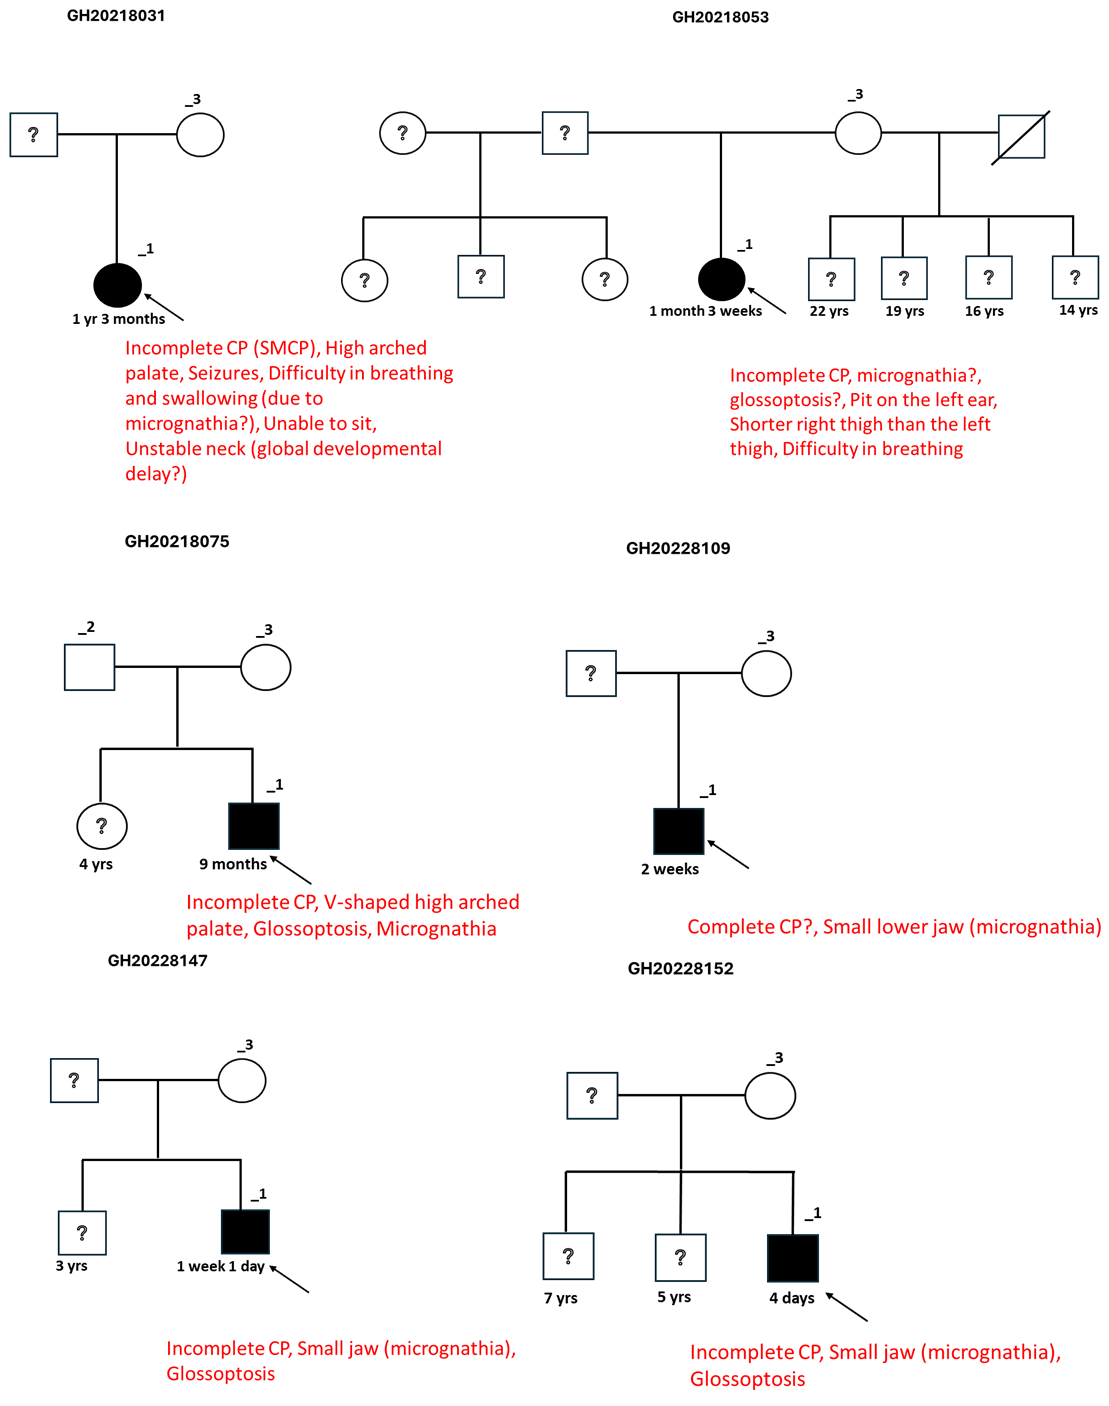

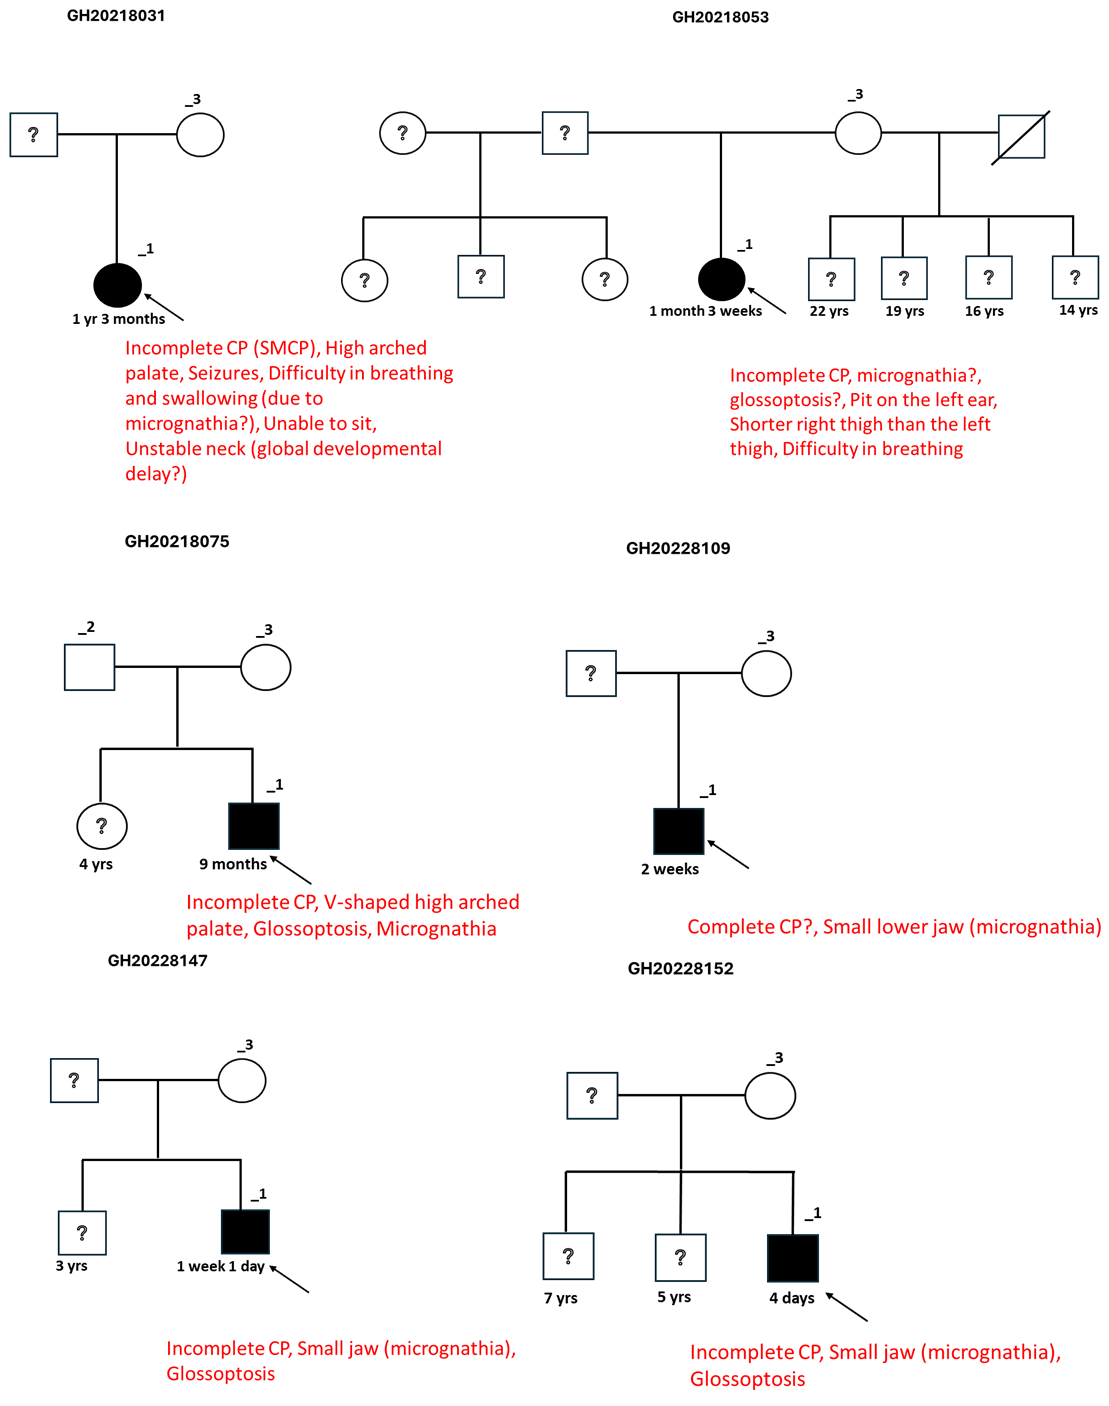

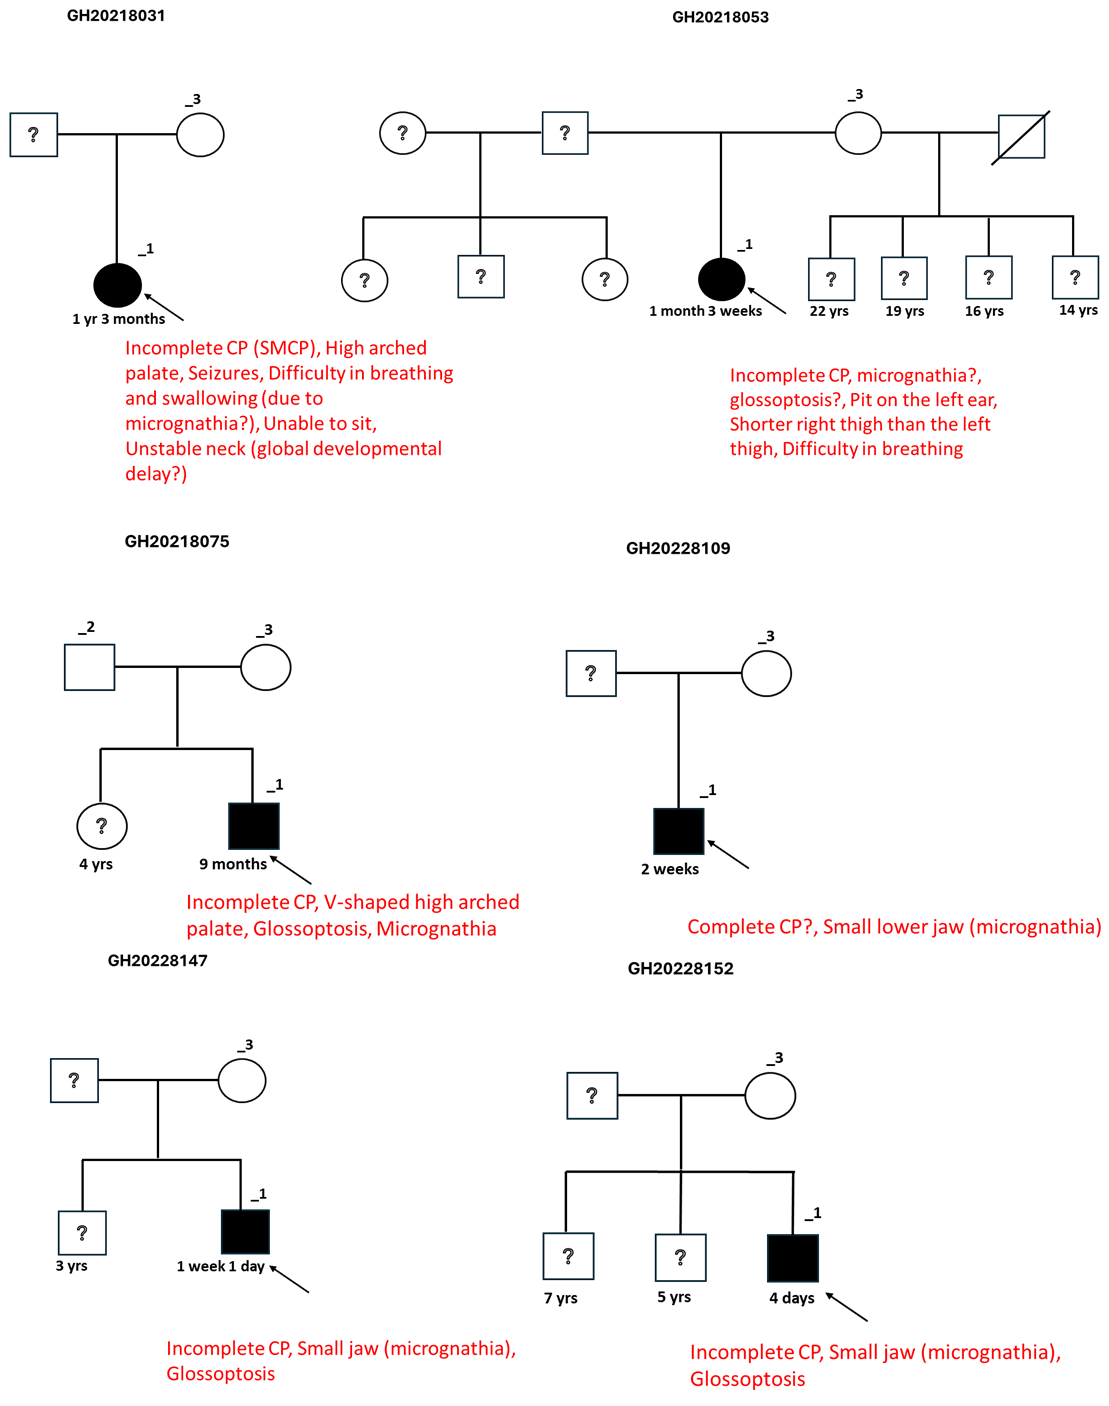

Supplement: Supplementary file 7 [file d04867b7b10ff0f05d1f51e7.docx]

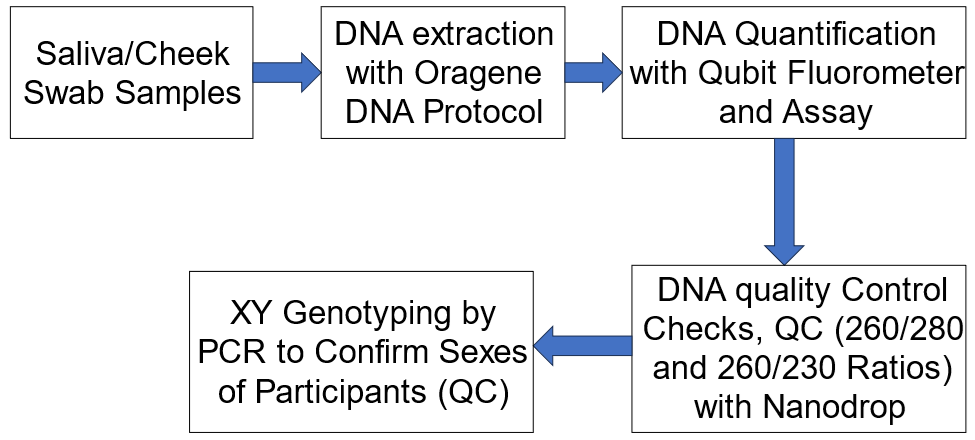

Supplement: Supplementary file 8 [file d760447af31a622adedcb68a.docx]
